# Supplementary material for: Evaluation of selected interleukins in patients with different gastric neoplasms: a preliminary report
Source: PubMed Central journal article supplement (PMC4613562; doi:10.1038/srep14382), 2015-10-21
Supplement: srep14382-s1.pdf [file srep14382-s1.pdf]

***Evaluation of selected interleukins in patients with different gastric neoplasms: a preliminary report.***

*Anna Madej-Michniewicz<sup>1</sup>, Marta Budkowska<sup>2</sup>, Daria Sałata<sup>2</sup>,  
Barbara Dołęgowska<sup>2</sup>, Teresa Starzyńska<sup>1</sup>, Wojciech Błogowski<sup>3\*</sup>*

<sup>1</sup> *Department of Gastroenterology,* <sup>2</sup> *Department of Medical Analytics, Pomeranian Medical University in Szczecin, Poland*

<sup>3</sup>*Department of Public Health, University of Zielona Góra, Poland*

Running title: Interleukins and gastric neoplasms.

Article type: Original research article

Correspondence/Reprints to:

Wojciech Błogowski, MD, PhD  
Department of Public Health;  
ul. Energetyków 2; 65-729 Zielona Góra, Poland;  
Tel/fax: (+48) 68 328 73 01;  
E-mail: drannab@wp.pl

**Supplementary Table 1. Analysis of associations between levels of examined interleukins and clinical presentation of gastric cancer in patients** (modelling using multivariate regression analysis).

| <b>Dependent variable</b>              | <b>Independent variable</b> | <b><math>\beta</math></b> | <b><math>R^2</math></b> | <b>p</b> |
|----------------------------------------|-----------------------------|---------------------------|-------------------------|----------|
| <i>Gastric cancer<br/>TNM staging*</i> | IL-6                        | 0.07                      | 0.005                   | 0.74     |
|                                        | IL-8                        | 0.13                      | 0.02                    | 0.53     |
|                                        | IL-10                       | -0.37                     | 0.13                    | 0.07     |
|                                        | IL-6/IL-8                   | 0.03                      | 0.001                   | 0.87     |
|                                        | IL-6/IL-10                  | 0.18                      | 0.03                    | 0.38     |
|                                        | IL-8/IL-10                  | 0.009                     | 0.01                    | 0.97     |

$\beta$  – standardized coefficient in the regression equation

p – level of significance

IL – interleukin

\* variable was created by assigning 1, 2, 3 or 4 value to appropriate TNM stage detected in patients with gastric cancer

**Supplementary Figure 1.** Levels of selected interleukins in patients with gastric cancer, other types of gastric neoplasms and control individuals (means  $\pm$  standard deviation).

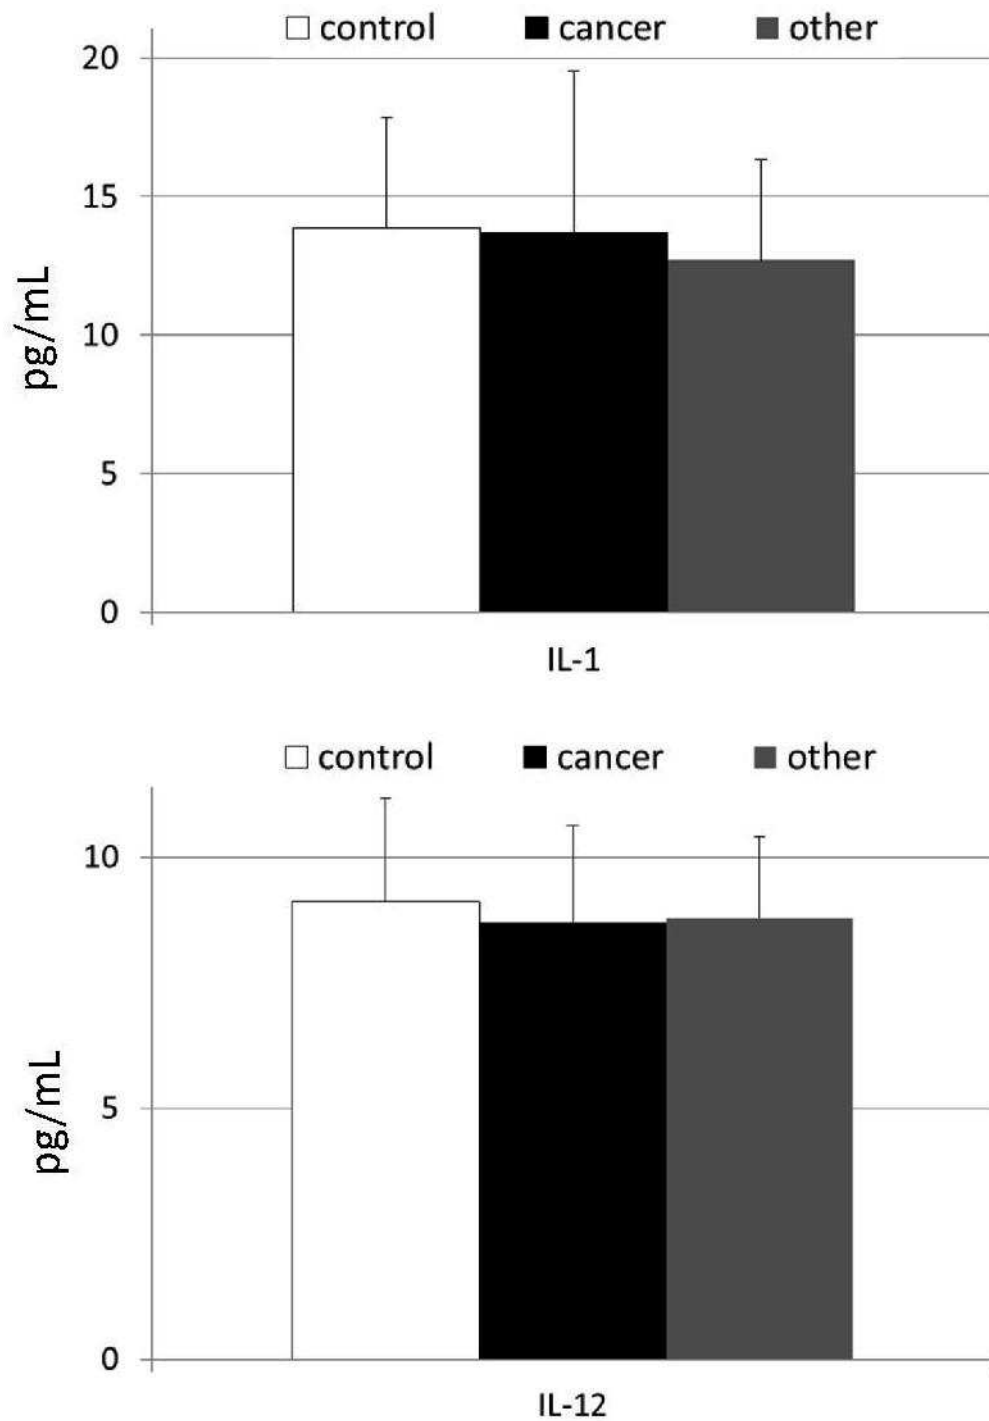

Statistical comparison revealed no significant differences in both IL-1 and IL-12 levels between control individuals, patients with gastric cancer and individuals diagnosed with other types of gastric malignancies (in all cases at least  $p > 0.1$ ).

**Supplementary Figure 2.** Levels of selected interleukins in healthy controls and patients with gastric cancer, divided into subgroups of early and advanced cancer (means  $\pm$  standard deviation).

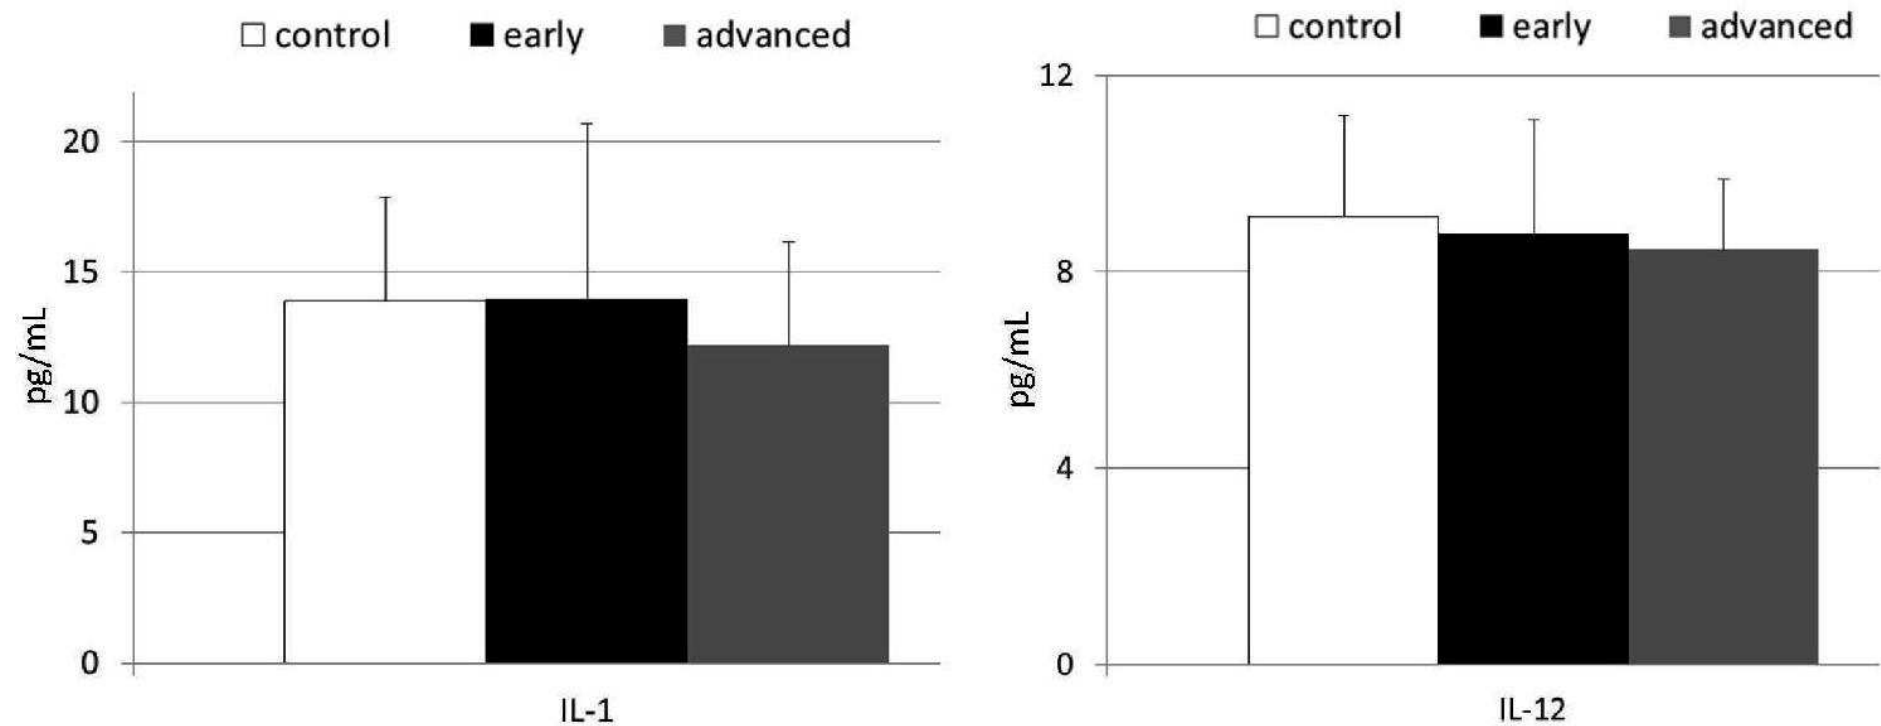

Statistical comparison revealed no significant differences in both IL-1 and IL-12 levels between control individuals, and patients with both early and advanced gastric cancer (in all cases at least  $p > 0.2$ ).
